# Supplementary material
Source: Elsevier journal article supplement (https://www.sciencedirect.com/science/article/pii/S2253654X20301724)
Supplement: mmc2 [file S2253654X20301724:mmc2.doc]

**TABLE 6** Summary of characteristics, PET/CT scan results and outcomes of 12 patients with PET/CT after reinduction regime

| Patient | Gender | Age (months) | Histology | Baseline PET/CT | | |  | PET image after reinduction regime | | | |  | CT image after reinduction regime | | Outcomes |
| --- | --- | --- | --- | --- | --- | --- | --- | --- | --- | --- | --- | --- | --- | --- | --- |
| Areas with the highest SUV | SUVmax | Other areas involved |  | Results | Residual lesions | SUVmax | Deauville Score |  | Residual lesions | Therapy response |
| 7 | Male | 108 | T-LBL | Cervical region, iliac vein area and inguinal region | 24.73 | Axilla, clavicular region, mediastinum, abdomen, pelvic cavity, right upper arm, nasopharynx and oropharynx |  | Positive | Cervical region | 2.7 | 4 |  | Cervical region | CR | Alive |
| 8 | Male | 132 | T-LBL | Mediastinum | 25.78 | Soft tissue around ribs |  | Positive | Mediastinum | 2.7 | 4 |  | Mediastinum | CR | Relapsed and died |
| 13 | Male | 108 | T-LBL | Mediastinum | 14.13 | Cervical region, clavicular region, axilla, and lumbar vertebra |  | Negative | N/A | N/A | 1 |  | Mediastinum | CR | Alive |
| 14 | Female | 57 | T-LBL | Cervical region | 10.42 | Parotid gland, clavicular region, axilla, mediastinum, and abdomen |  | Negative | N/A | N/A | 1 |  | N/A | CR | Relapsed and died |
| 17 | Male | 45 | B-LBL | Renal pelvis | 13.92 | Paranasal sinuses and penis |  | Negative | N/A | N/A | 1 |  | Paranasal sinuses | CR | Alive |
| 18 | Male | 96 | B-LBL | Sacrum and ilium | 7.38 | Forehead skin |  | Negative | N/A | N/A | 1 |  | Sacrum and ilium | CR | Alive |
| 20 | Male | 72 | T-LBL | Cervical region | 7.94 | Parotid gland, oropharynx, and tongue |  | Negative | N/A | N/A | 1 |  | N/A | CR | Alive |
| 22 | Male | 96 | T-LBL | Mediastinum | 5.70 | The cervical region, axilla, clavicular region, abdomen, pelvic cavity, inguinal region |  | Negative | N/A | N/A | 1 |  | N/A | CR | Alive |
| 23 | Female | 17 | B-LBL | Kidney | 4.34 | Cervical region, abdomen, pancreas |  | Negative | N/A | N/A | 1 |  | Kidney | CR | Alive |
| 24 | Male | 60 | B-LBL | Abdomen | 7.83 | Pelvic cavity, spleen |  | Negative | N/A | N/A | 1 |  | Spleen | CR | Alive |
| 26 | Male | 46 | T-LBL | Mediastinum | 6.53 | Retroperitoneal nodules, pleural effusion |  | Negative | N/A | N/A | 1 |  | Mediastinum | CR | Alive |
| 30 | Male | 39 | T-LBL | Cervical region | 3.4 | Clavicular region, axilla, pelvic cavity, inguinal region |  | Negative | N/A | N/A | 1 |  | N/A | CR | Alive |

PET/CT, positron emission tomography/computed tomography; T-LBL, T-cell lymphoblastic lymphoma; B-LBL, B-cell lymphoblastic lymphoma; SUVmax, maximum standardized uptake value; and CR, complete remission.
